# Supplementary material for: A Novel ACTL6A Exonic Circular RNA Exacerbates Polycystic Ovary Syndrome via Recruiting TET1
Source: Research Square preprint supplement (doi:10.21203/rs.3.rs-231266/v1), 2021-02-24
Supplement: Supplementary file 1 [file a668d0dcd1081c70f39a048a.csv]

GO Category	p-value	#genes	#miRNAs
organelle	0	5207	44
ion binding	1.80E-180	3223	44
cellular nitrogen compound metabolic process	5.25E-174	2565	44
biosynthetic process	4.16E-100	2085	44
cellular protein modification process	1.96E-81	1279	44
small molecule metabolic process	3.17E-70	1247	43
gene expression	3.90E-70	367	43
neurotrophin TRK receptor signaling pathway	8.11E-63	191	40
catabolic process	9.91E-55	1036	43
molecular_function	2.41E-48	8141	44
nucleic acid binding transcription factor activity	5.91E-45	571	44
symbiosis, encompassing mutualism through parasitism	2.45E-43	305	42
protein complex	4.47E-43	1895	44
Fc-epsilon receptor signaling pathway	6.47E-43	118	41
viral process	6.47E-43	274	42
cellular component assembly	1.18E-42	711	44
enzyme binding	2.32E-42	709	43
cytosol	4.24E-41	1415	44
cellular_component	2.85E-39	8194	44
protein binding transcription factor activity	4.18E-39	304	41
cellular protein metabolic process	1.70E-36	260	42
blood coagulation	3.56E-33	261	43
nucleobase-containing compound catabolic process	8.48E-30	477	42
mitotic cell cycle	1.02E-29	219	42
macromolecular complex assembly	1.16E-29	472	44
post-translational protein modification	4.56E-29	112	41
nucleoplasm	7.60E-29	620	43
cytoskeletal protein binding	2.11E-28	431	43
epidermal growth factor receptor signaling pathway	1.04E-27	144	40
membrane organization	8.75E-26	317	42
protein complex assembly	3.39E-22	405	42
response to stress	4.27E-22	1069	44
synaptic transmission	7.57E-21	238	41
cell death	8.27E-20	465	43
cellular lipid metabolic process	5.39E-19	91	38
fibroblast growth factor receptor signaling pathway	3.99E-17	122	41
platelet activation	8.23E-17	118	42
enzyme regulator activity	9.36E-17	418	43
biological_process	6.53E-15	7791	44
microtubule organizing center	6.82E-15	257	42
glycosaminoglycan metabolic process	1.23E-14	67	34
mRNA metabolic process	1.80E-14	111	42
cell junction assembly	4.12E-14	46	34
Fc-gamma receptor signaling pathway involved in phagocytosis	7.95E-14	46	36
cell-cell signaling	8.50E-14	328	42
toll-like receptor 10 signaling pathway	1.10E-13	41	37
phosphatidylinositol-mediated signaling	4.51E-13	87	39
platelet degranulation	6.19E-13	49	29
RNA metabolic process	9.01E-13	125	42
cell junction organization	9.94E-13	94	39
toll-like receptor TLR1:TLR2 signaling pathway	3.42E-12	41	38
toll-like receptor TLR6:TLR2 signaling pathway	3.42E-12	41	38
protein N-linked glycosylation via asparagine	4.20E-12	63	38
DNA metabolic process	3.80E-11	368	42
TRIF-dependent toll-like receptor signaling pathway	4.14E-11	42	36
toll-like receptor 5 signaling pathway	6.96E-11	41	37
immune system process	6.97E-11	725	43
cellular component disassembly involved in execution phase of apoptosis	8.83E-11	33	34
platelet alpha granule lumen	1.13E-10	31	26
toll-like receptor 9 signaling pathway	2.00E-10	43	37
G2/M transition of mitotic cell cycle	9.82E-10	86	41
MyD88-independent toll-like receptor signaling pathway	1.41E-09	43	36
RNA binding	2.16E-09	845	44
leukocyte migration	3.11E-09	68	37
extracellular matrix organization	5.43E-09	191	41
inositol phosphate metabolic process	1.51E-08	31	29
toll-like receptor signaling pathway	2.12E-08	61	39
extracellular matrix disassembly	2.26E-08	59	36
chondroitin sulfate metabolic process	4.06E-08	31	31
activation of signaling protein activity involved in unfolded protein response	8.29E-08	37	24
energy reserve metabolic process	1.40E-07	54	38
transcription initiation from RNA polymerase II promoter	1.83E-07	114	40
activation of phospholipase C activity	2.49E-07	41	38
intrinsic apoptotic signaling pathway	3.14E-07	44	34
toll-like receptor 4 signaling pathway	3.19E-07	51	39
toll-like receptor 2 signaling pathway	7.17E-07	41	38
transmembrane transporter activity	7.74E-07	477	42
toll-like receptor 3 signaling pathway	8.37E-07	42	36
vitamin metabolic process	1.07E-06	42	27
phospholipid metabolic process	1.76E-06	86	36
hexose transport	2.72E-06	25	27
glycerophospholipid biosynthetic process	3.19E-06	45	31
small conjugating protein binding	3.42E-06	54	38
sulfur compound metabolic process	3.46E-06	133	36
chromatin organization	5.14E-06	67	38
phosphatidylinositol biosynthetic process	6.07E-06	38	30
cell motility	6.88E-06	260	42
nucleobase-containing small molecule metabolic process	1.20E-05	34	24
nucleotide-binding domain, leucine rich repeat containing receptor signaling pathway	1.42E-05	25	26
water-soluble vitamin metabolic process	1.94E-05	36	27
insulin receptor signaling pathway	1.96E-05	87	40
termination of RNA polymerase II transcription	2.59E-05	26	29
generation of precursor metabolites and energy	2.90E-05	148	41
axon guidance	2.90E-05	220	41
regulation of small GTPase mediated signal transduction	3.89E-05	108	38
innate immune response	4.41E-05	316	43
MyD88-dependent toll-like receptor signaling pathway	5.68E-05	47	38
stress-activated MAPK cascade	7.36E-05	29	34
mRNA 3'-end processing	0.000123292	23	27
cytoskeleton organization	0.000147754	304	41
nuclear-transcribed mRNA catabolic process, deadenylation-dependent decay	0.000166128	33	36
post-Golgi vesicle-mediated transport	0.000167896	28	32
transcription, DNA-templated	0.000242371	1122	43
positive regulation of protein insertion into mitochondrial membrane involved in apoptotic signaling pathway	0.00048107	19	25
vesicle-mediated transport	0.000567365	456	43
positive regulation of muscle cell differentiation	0.000596972	20	27
regulation of glucose transport	0.000741222	19	24
regulation of ubiquitin-protein ligase activity involved in mitotic cell cycle	0.000875807	35	31
ncRNA metabolic process	0.000956808	14	23
cytoskeleton-dependent intracellular transport	0.001102359	54	34
long-chain fatty-acyl-CoA biosynthetic process	0.001353957	11	18
DNA damage response, signal transduction by p53 class mediator resulting in cell cycle arrest	0.001353957	36	33
apoptotic signaling pathway	0.001433159	64	39
mitotic nuclear envelope disassembly	0.001686292	19	25
homeostatic process	0.002010785	347	43
regulation of rhodopsin mediated signaling pathway	0.002163937	16	18
lysosomal lumen	0.002287078	29	26
cell-cell junction organization	0.002287078	41	36
anatomical structure morphogenesis	0.00265357	51	37
nervous system development	0.002728493	209	42
regulation of transcription from RNA polymerase II promoter in response to hypoxia	0.00285807	17	26
protein maturation	0.003366012	92	41
regulation of cellular amino acid metabolic process	0.003419694	27	30
muscle cell differentiation	0.003510279	28	33
nucleotide-binding oligomerization domain containing signaling pathway	0.004408828	14	24
regulation of cardiac muscle contraction by regulation of the release of sequestered calcium ion	0.004669538	16	29
protein targeting	0.004669538	128	42
protein binding, bridging	0.005942136	73	40
positive regulation of ubiquitin-protein ligase activity involved in mitotic cell cycle	0.005958204	32	30
regulation of defense response to virus by virus	0.005991142	14	24
JAK-STAT cascade involved in growth hormone signaling pathway	0.005991142	14	25
O-glycan processing	0.006147752	24	19
viral life cycle	0.006730239	43	33
nucleocytoplasmic transport	0.008273295	160	42
cellular component movement	0.008521018	50	36
G1/S transition of mitotic cell cycle	0.008521018	83	37
keratan sulfate biosynthetic process	0.011268415	15	17
regulation of insulin secretion	0.013012109	52	36
'de novo' posttranslational protein folding	0.013781645	20	26
ribonucleoprotein complex assembly	0.013781645	66	42
phototransduction, visible light	0.014023254	40	30
xenobiotic metabolic process	0.015410142	55	35
SH3/SH2 adaptor activity	0.01584388	33	32
adherens junction organization	0.018890727	23	30
glutamate secretion	0.020730866	15	25
keratan sulfate metabolic process	0.023493252	16	18
cytokine-mediated signaling pathway	0.024610464	136	39
vacuole	0.027356008	131	39
histone binding	0.028141998	89	39
cofactor metabolic process	0.028357257	101	36
activation of protein kinase A activity	0.030378416	11	20
negative regulation of ubiquitin-protein ligase activity involved in mitotic cell cycle	0.030378416	29	28
Golgi lumen	0.031742514	38	33
positive regulation of signal transduction	0.03432331	39	33
nucleobase-containing small molecule interconversion	0.035510832	9	11
vacuolar transport	0.043983464	37	30
